# Supplementary material for: Adsorption and diffusion of alkali metals (Li, Na, and K) on heteroatom-doped monolayer titanium disulfide
Source: Royal Society of Chemistry journal article supplement (doi:10.1039/d1dt00490e), 2021-01-01
Supplement: d1dt00490e1.pdf [file d1dt00490e1.pdf]

*Supplementary information*

**Adsorption and Diffusion of Alkali Metals (Li, Na, and K)  
on Heteroatom-Doped Monolayer Titanium Disulfide**

Ruixue Tian, Aimin Wu, Guifeng Zhang, Jia Liu, Ramon Alberto Paredes  
Camacho, Wenhua Yu, Shuyu Zhou, Man Yao, Hao Huang\*

*Key Laboratory of Energy Materials and Devices (Liaoning Province), School  
of Materials Science and Engineering, Dalian University of Technology, Dalian  
116024, Liaoning Province, China*

**Corresponding author: Hao Huang**

**E-mail: huanghao@dlut.edu.cn**

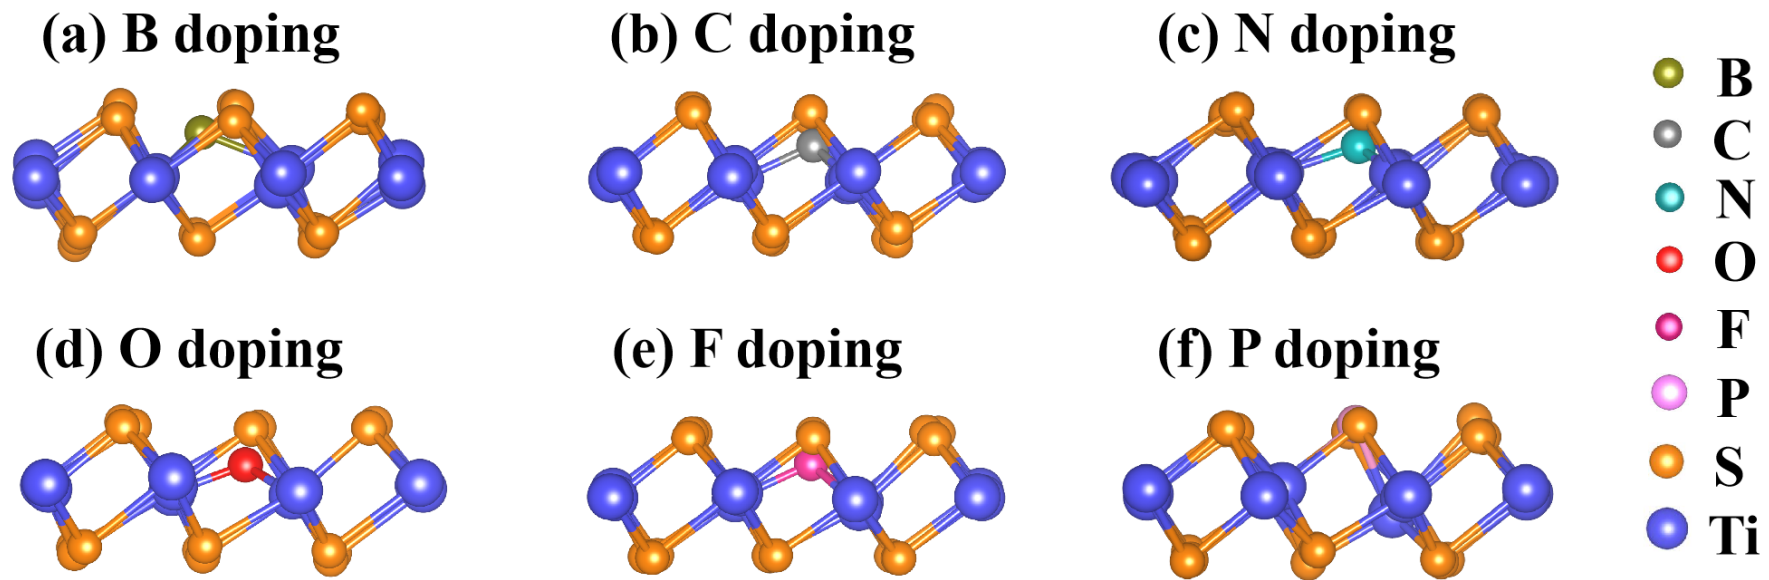

**Fig. S1** The total density of state (TDOS) of monolayer  $\text{TiS}_2$  doped with heteroatoms (a) B, (b) C, (c) N, (d) O, (e) F, and (f) P. The Fermi energies in each case are set to 0 eV.

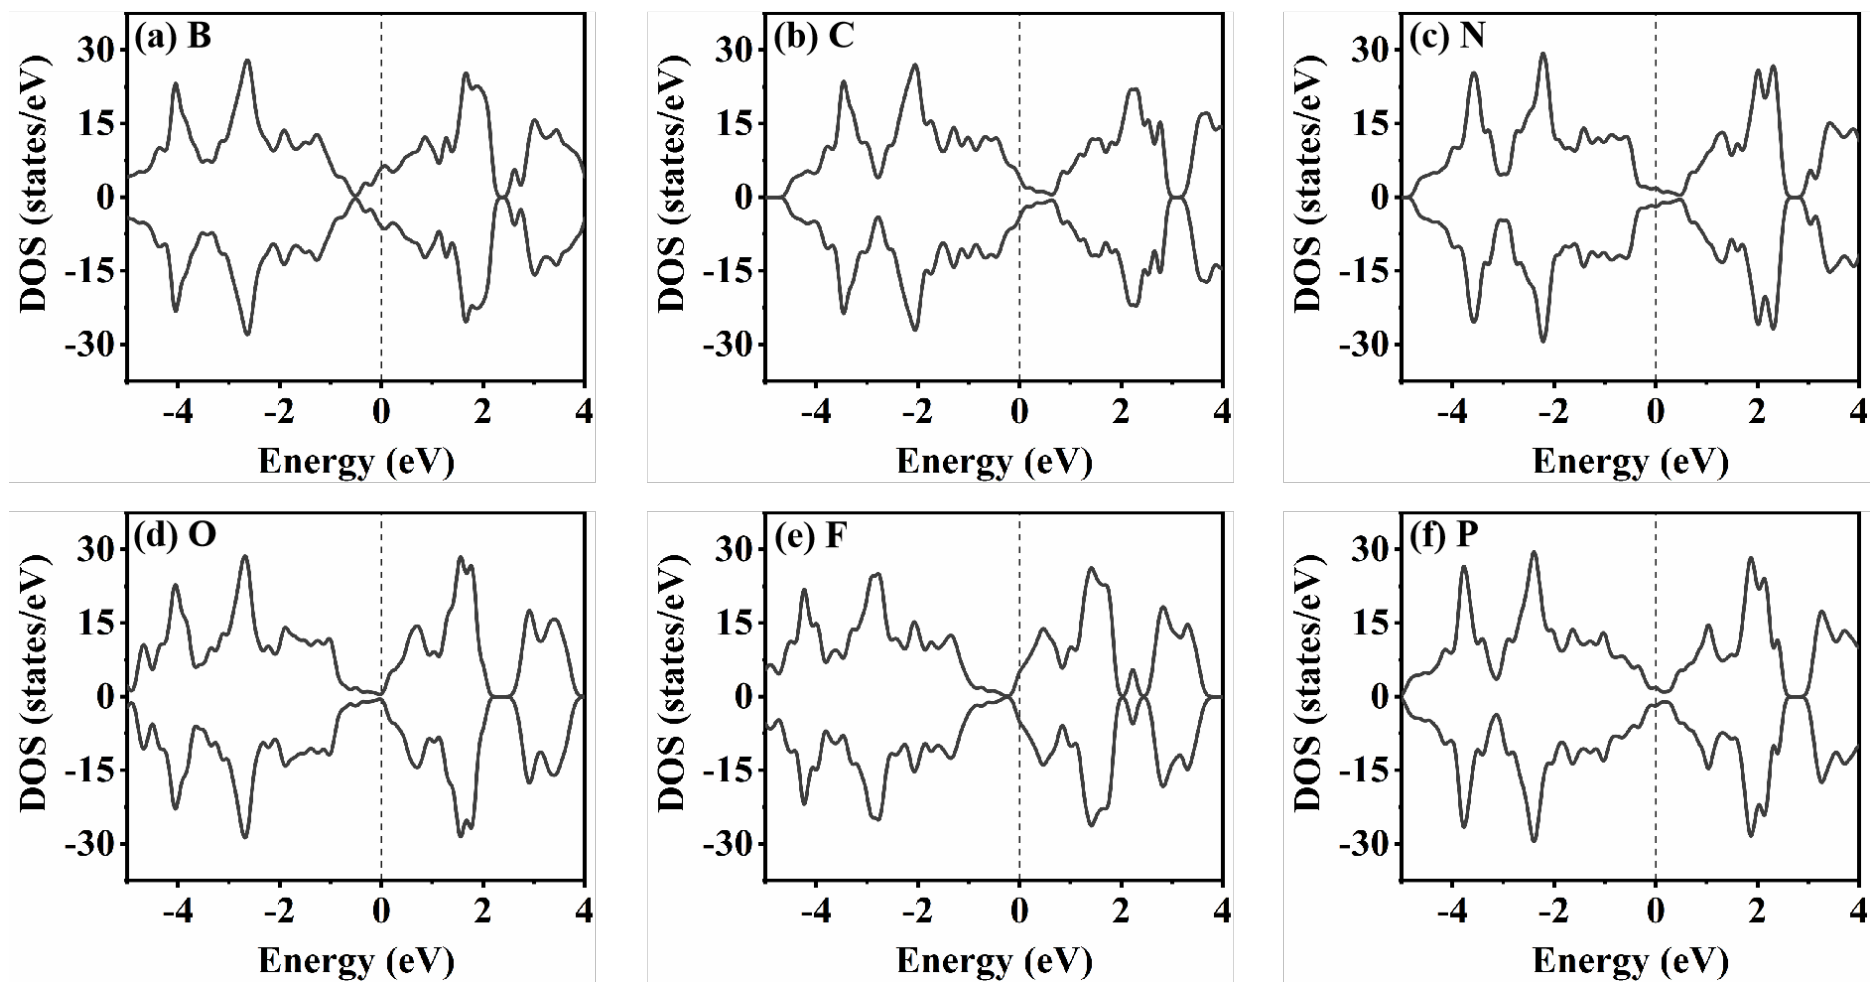

**Fig. S2** The total density of state (TDOS) of monolayer  $\text{TiS}_2$  doped with heteroatoms (a) B, (b) C, (c) N, (d) O, (e) F, and (f) P. The Fermi energies in each case are set to 0 eV.

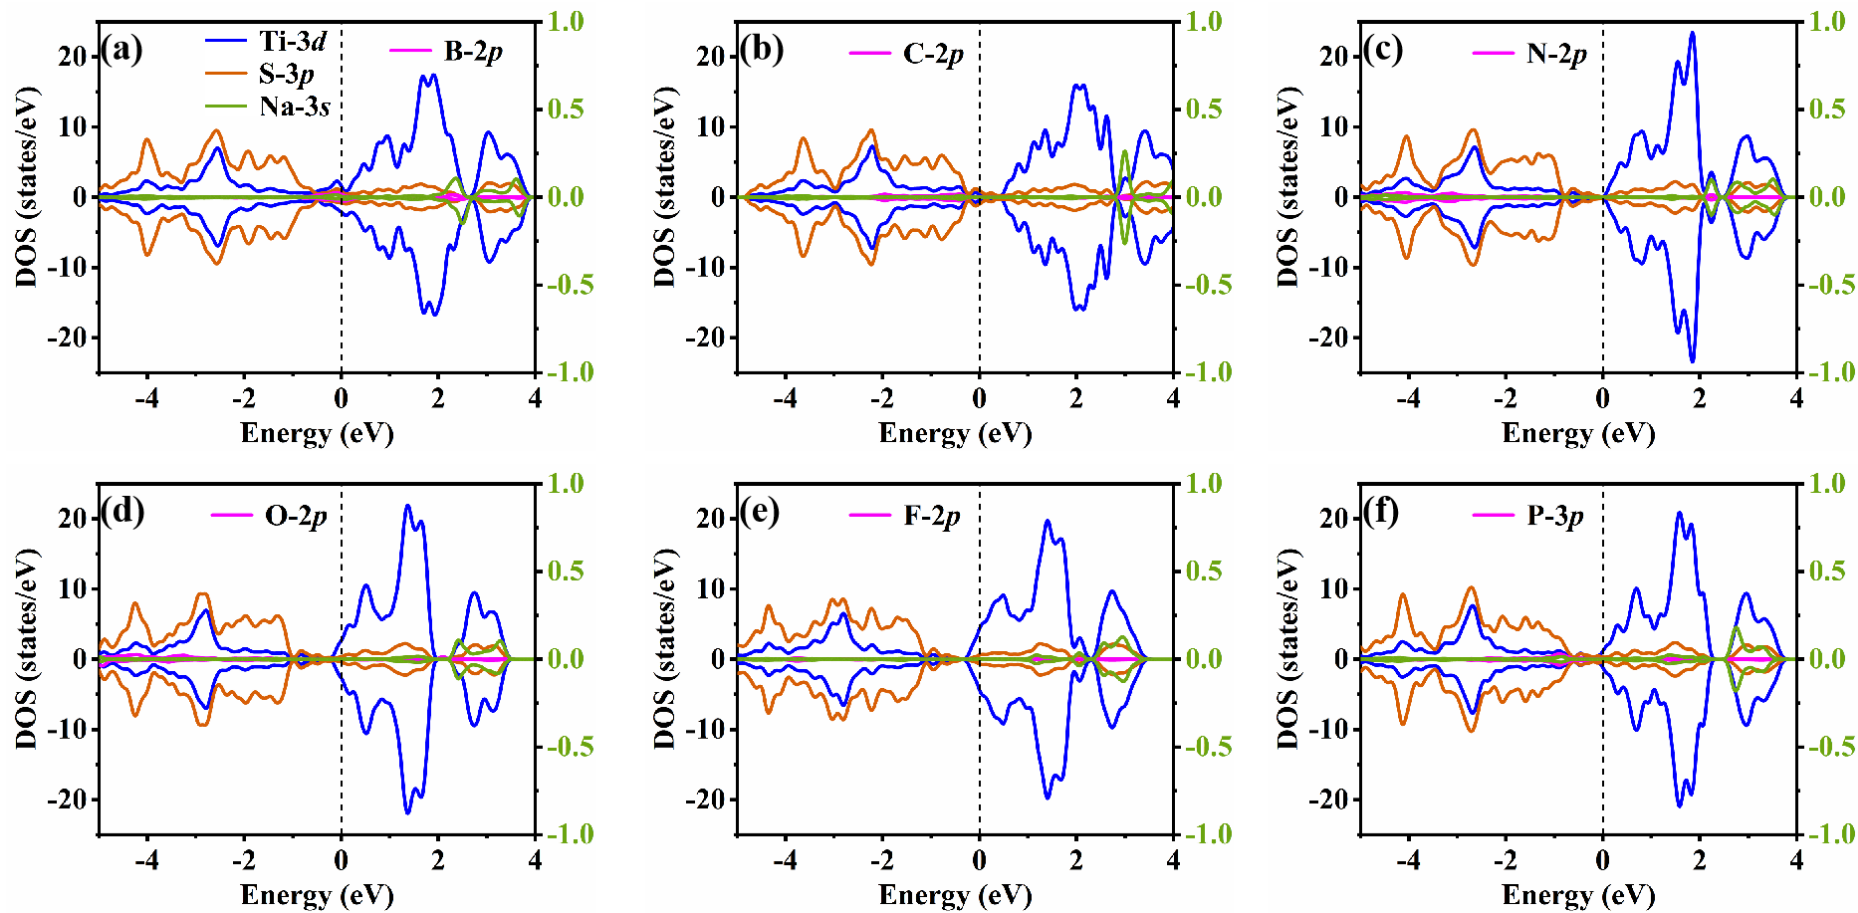

**Fig. S3** The projected density of state (PDOS) of Na adsorbed on monolayer  $\text{TiS}_2$  doped with heteroatoms (a) B, (b) C, (c) N, (d) O, (e) F, and (f) P. The Fermi energies in each case are set to 0 eV.

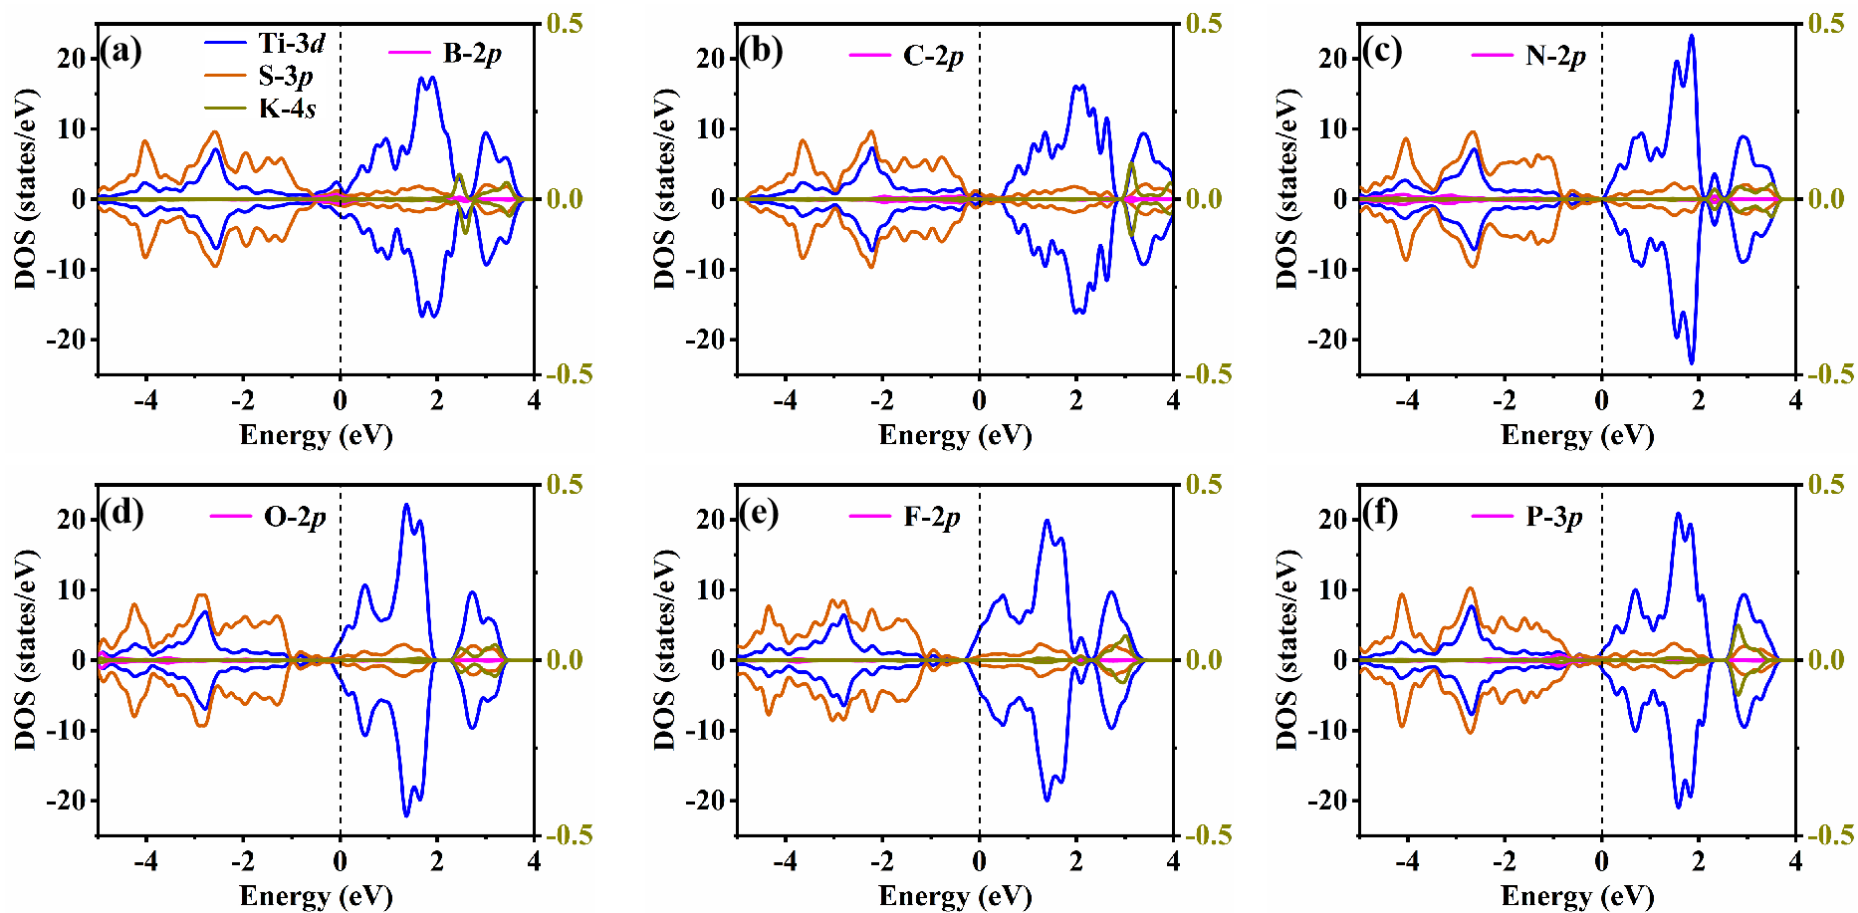

**Fig. S4** The PDOS of K adsorbed on monolayer  $\text{TiS}_2$  doped with heteroatoms (a) B, (b) C, (c) N, (d) O, (e) F, and (f) P. The Fermi energies in each case are set to 0 eV.

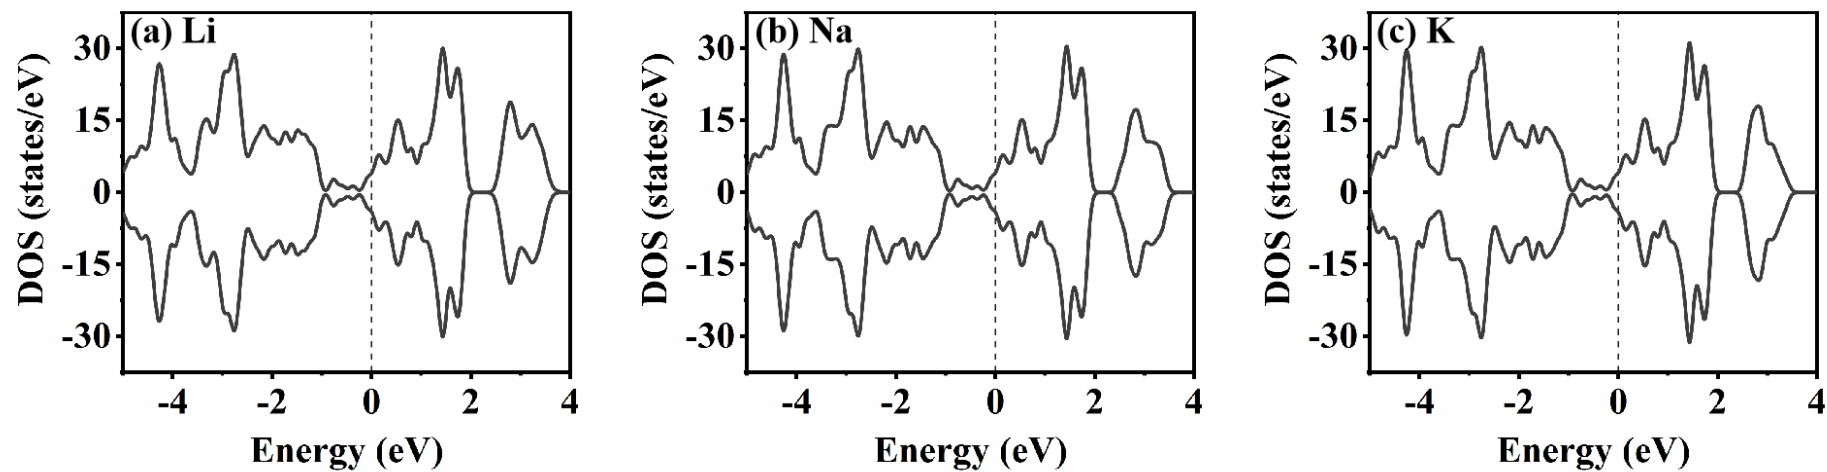

**Fig. S5** The TDOS of (a) Li, (b) Na, and (c) K adsorbed on pristine monolayer TiS<sub>2</sub>. The Fermi energies in each case are set to 0 eV.

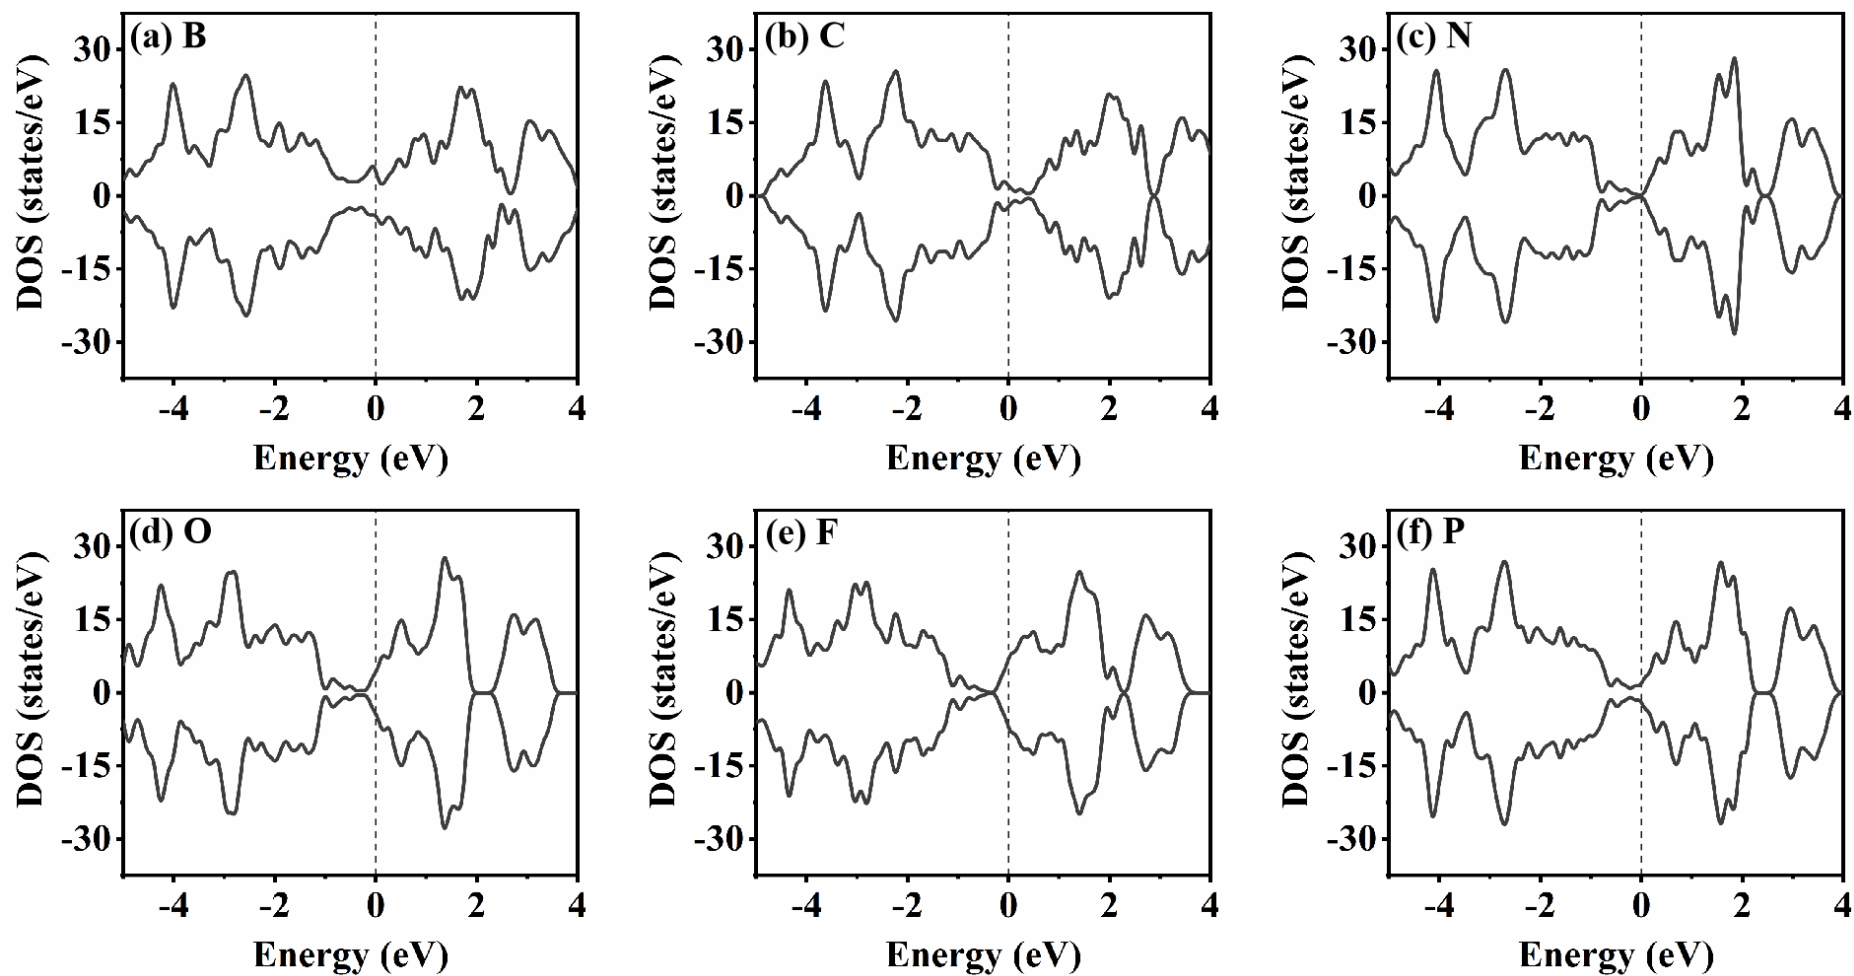

**Fig. S6** The TDOS of Li adsorbed on monolayer TiS<sub>2</sub> doped with heteroatoms (a) B, (b) C, (c) N, (d) O, (e) F, and (f) P. The Fermi energies in each case are set to 0 eV.

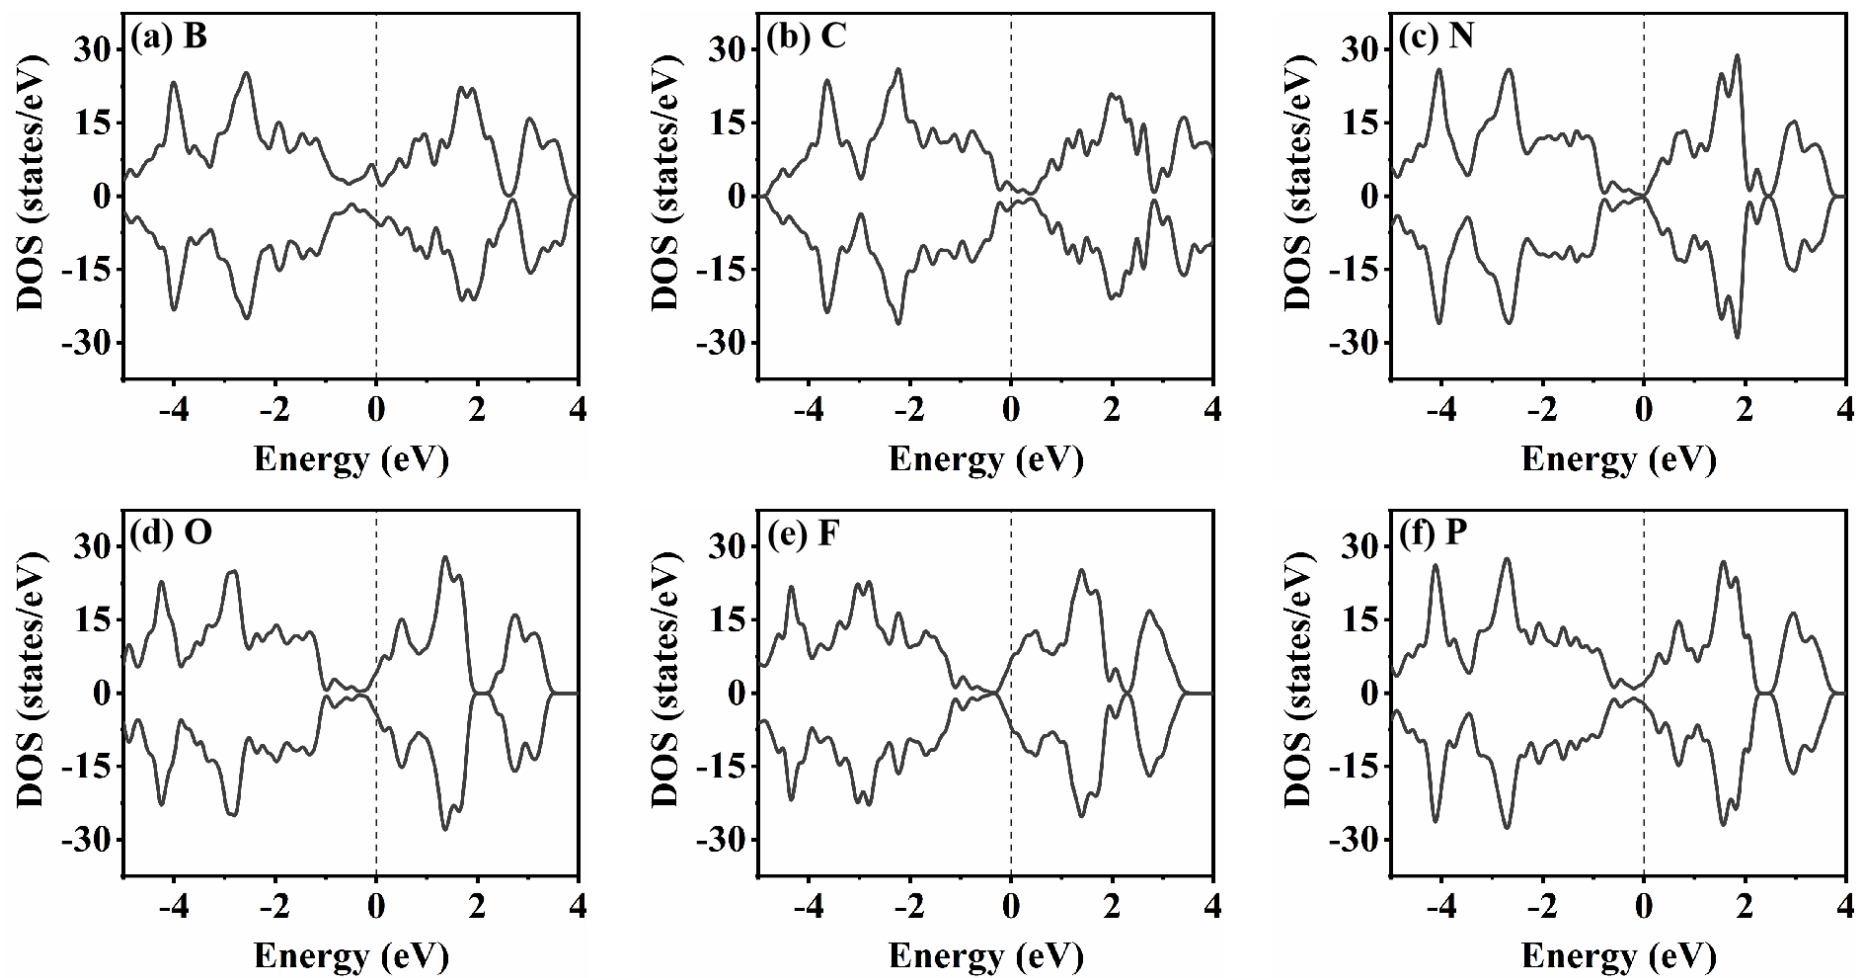

**Fig. S7** The TDOS of Na adsorbed on monolayer TiS<sub>2</sub> doped with heteroatoms (a) B, (b) C, (c) N, (d) O, (e) F, and (f) P. The Fermi energies in each case are set to 0 eV.



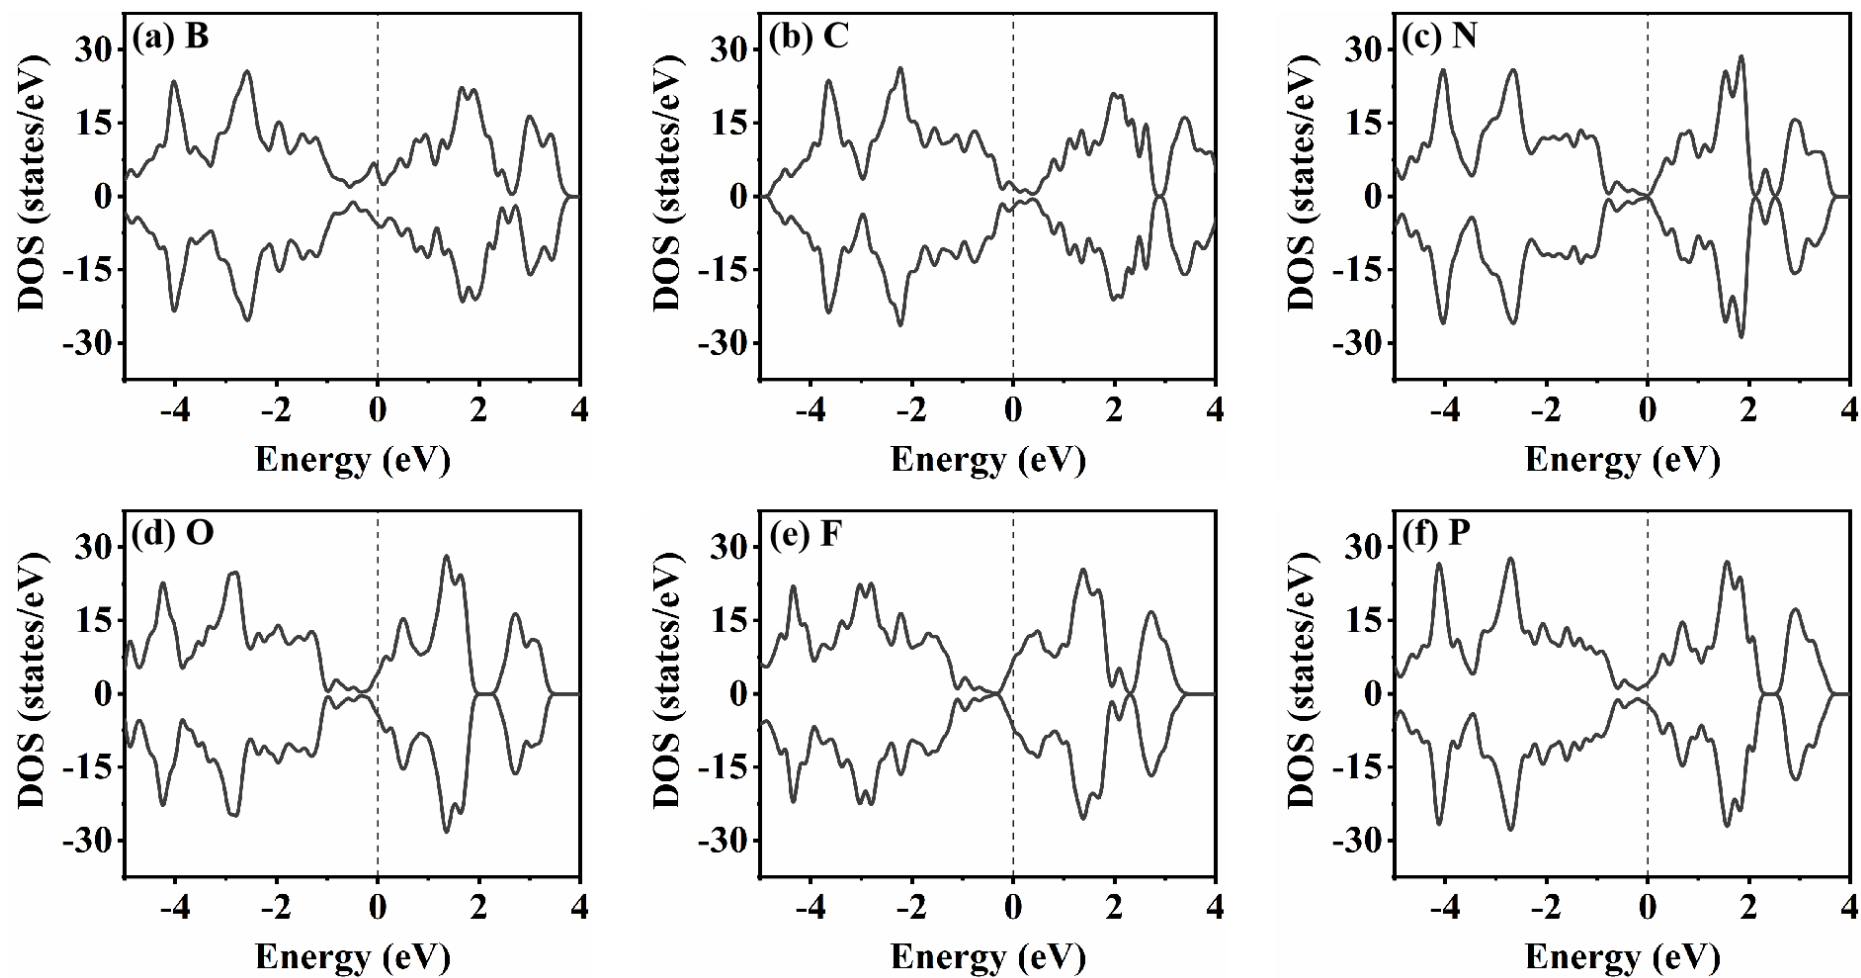

**Fig. S8** The TDOS of K adsorbed on monolayer TiS<sub>2</sub> doped with heteroatoms (a) B, (b) C, (c) N, (d) O, (e) F, and (f) P. The Fermi energies in each case are set to 0 eV.

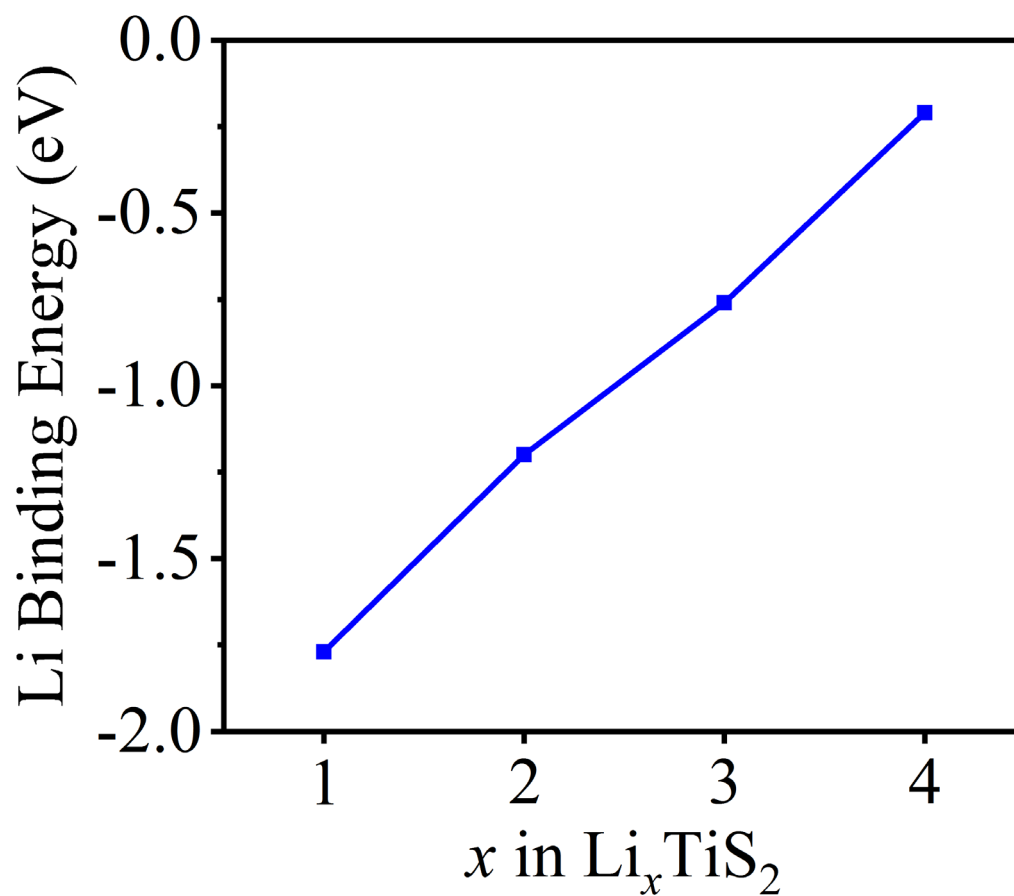

**Fig. S9** The binding energy as a function of Li adsorption concentration.

**Table S1** Calculated adsorption energies of Li, Na, and K adsorbed on different sites of the pristine and heteroatom-doped monolayer TiS<sub>2</sub>.

| Metals | Dopants | Sites          |                |                |                |                |                |                |                |
|--------|---------|----------------|----------------|----------------|----------------|----------------|----------------|----------------|----------------|
|        |         | H <sub>1</sub> | H <sub>2</sub> | H <sub>3</sub> | H <sub>4</sub> | T <sub>1</sub> | T <sub>2</sub> | T <sub>3</sub> | T <sub>4</sub> |
| Li     | None    | -3.58          | -3.58          | -3.58          | -3.58          | -3.57          | -3.57          | -3.57          | -3.57          |
|        | B       | -3.77          | -3.61          | -3.64          | -3.64          | -3.59          | -3.61          | -3.61          | -3.61          |
|        | C       | -4.48          | -4.11          | -4.15          | -4.15          | -4.31          | -4.13          | -4.13          | -4.13          |
|        | N       | -4.15          | -3.91          | -3.94          | -3.94          | -4.02          | -3.92          | -3.93          | -3.92          |
|        | O       | -3.64          | -3.50          | -3.53          | -3.53          | -3.58          | -3.49          | -3.51          | -3.49          |
|        | F       | -3.49          | -3.41          | -3.44          | -3.44          | -3.44          | -3.40          | -3.41          | -3.40          |
|        | P       | -3.81          | -3.75          | -3.75          | -3.75          | -3.78          | -3.75          | -3.74          | -3.75          |
| Na     | None    | -2.96          | -2.96          | -2.96          | -2.96          | -2.95          | -2.95          | -2.95          | -2.95          |
|        | B       | -3.06          | -2.99          | -3.02          | -3.02          | -3.01          | -2.99          | -3.00          | -2.99          |
|        | C       | -3.83          | -3.52          | -3.55          | -3.55          | -3.78          | -3.53          | -3.53          | -3.53          |
|        | N       | -3.54          | -3.30          | -3.33          | -3.33          | -3.50          | -3.31          | -3.32          | -3.31          |
|        | O       | -3.05          | -2.89          | -2.91          | -2.91          | -3.03          | -2.88          | -2.90          | -2.88          |
|        | F       | -2.94          | -2.79          | -2.82          | -2.82          | -2.92          | -2.78          | -2.80          | -2.78          |
|        | P       | -3.19          | -3.15          | -3.15          | -3.15          | -3.17          | -3.14          | -3.14          | -3.14          |
| K      | None    | -3.22          | -3.22          | -3.22          | -3.22          | -3.21          | -3.21          | -3.21          | -3.21          |
|        | B       | -3.32          | -3.24          | -3.28          | -3.27          | -3.28          | -3.23          | -3.25          | -3.24          |
|        | C       | -4.10          | -3.78          | -3.80          | -3.80          | -4.08          | -3.78          | -3.78          | -3.78          |
|        | N       | -3.83          | -3.56          | -3.59          | -3.58          | -3.82          | -3.56          | -3.56          | -3.57          |

|   |       |       |       |       |       |       |       |       |
|---|-------|-------|-------|-------|-------|-------|-------|-------|
| O | -3.38 | -3.14 | -3.16 | -3.16 | -3.37 | -3.13 | -3.14 | -3.13 |
| F | -3.26 | -3.04 | -3.07 | -3.08 | -3.25 | -3.03 | -3.05 | -3.03 |
| P | -3.43 | -3.41 | -3.40 | -3.40 | -3.41 | -3.40 | -3.39 | -3.40 |

---

**Table S2** Calculated adsorption energies of Li, Na, and K adsorbed on different sites of the pristine and heteroatom-doped monolayer TiS<sub>2</sub>. Note that the adsorption energy values are obtained by equation (2) expressing  $E_M$  with the energy of per atom in the bulk of crystal M (M = Li, Na, and K).

| Metals | Dopants | Sites          |                |                |                |                |                |                |                |
|--------|---------|----------------|----------------|----------------|----------------|----------------|----------------|----------------|----------------|
|        |         | H <sub>1</sub> | H <sub>2</sub> | H <sub>3</sub> | H <sub>4</sub> | T <sub>1</sub> | T <sub>2</sub> | T <sub>3</sub> | T <sub>4</sub> |
| Li     | None    | -1.88          | -1.88          | -1.88          | -1.88          | -1.87          | -1.87          | -1.87          | -1.87          |
|        | B       | -2.07          | -1.91          | -1.94          | -1.94          | -1.89          | -1.91          | -1.91          | -1.91          |
|        | C       | -2.78          | -2.41          | -2.45          | -2.45          | -2.61          | -2.43          | -2.43          | -2.43          |
|        | N       | -2.45          | -2.21          | -2.24          | -2.24          | -2.32          | -2.22          | -2.23          | -2.22          |
|        | O       | -1.94          | -1.80          | -1.83          | -1.83          | -1.88          | -1.79          | -1.81          | -1.79          |
|        | F       | -1.79          | -1.71          | -1.74          | -1.74          | -1.74          | -1.70          | -1.71          | -1.70          |
|        | P       | -2.11          | -2.05          | -2.05          | -2.05          | -2.08          | -2.05          | -2.04          | -2.05          |
| Na     | None    | -1.74          | -1.74          | -1.74          | -1.74          | -1.73          | -1.73          | -1.73          | -1.73          |
|        | B       | -1.84          | -1.77          | -1.80          | -1.80          | -1.79          | -1.77          | -1.78          | -1.77          |
|        | C       | -2.61          | -2.30          | -2.33          | -2.33          | -2.56          | -2.31          | -2.31          | -2.31          |
|        | N       | -2.32          | -2.08          | -2.11          | -2.11          | -2.28          | -2.09          | -2.10          | -2.09          |
|        | O       | -1.83          | -1.67          | -1.69          | -1.69          | -1.81          | -1.66          | -1.68          | -1.66          |
|        | F       | -1.72          | -1.57          | -1.60          | -1.60          | -1.70          | -1.56          | -1.58          | -1.56          |
|        | P       | -1.97          | -1.93          | -1.93          | -1.93          | -1.95          | -1.92          | -1.92          | -1.92          |
| K      | None    | -2.29          | -2.29          | -2.29          | -2.29          | -2.28          | -2.28          | -2.28          | -2.28          |
|        | B       | -2.39          | -2.31          | -2.35          | -2.34          | -2.35          | -2.30          | -2.32          | -2.31          |

|   |       |       |       |       |       |       |       |       |
|---|-------|-------|-------|-------|-------|-------|-------|-------|
| C | -3.17 | -2.85 | -2.87 | -2.87 | -3.15 | -2.85 | -2.85 | -2.85 |
| N | -2.90 | -2.63 | -2.66 | -2.65 | -2.89 | -2.63 | -2.63 | -2.64 |
| O | -2.45 | -2.21 | -2.23 | -2.23 | -2.44 | -2.20 | -2.21 | -2.20 |
| F | -2.33 | -2.11 | -2.14 | -2.15 | -2.32 | -2.10 | -2.12 | -2.10 |
| P | -2.50 | -2.48 | -2.47 | -2.47 | -2.48 | -2.47 | -2.46 | -2.47 |

---

**Table S3** The calculated formation energies ( $E_f$ ) for the heteroatom-doped monolayer TiS<sub>2</sub> with and without the dipole correction, and their differences ( $\Delta E$ ) with and without the dipole correction.

| Dopants | Dipole correction |                 | No dipole correction |                 | Differences         |                      |
|---------|-------------------|-----------------|----------------------|-----------------|---------------------|----------------------|
|         | $E_f$ (S-rich)    | $E_f$ (Ti-rich) | $E_f$ (S-rich)       | $E_f$ (Ti-rich) | $\Delta E$ (S-rich) | $\Delta E$ (Ti-rich) |
|         | (eV)              | (eV)            | (eV)                 | (eV)            | (eV)                | (eV)                 |
| B       | 4.83              | 2.89            | 4.82                 | 2.87            | 0.01                | 0.02                 |
| C       | 4.59              | 2.65            | 4.58                 | 2.63            | 0.01                | 0.02                 |
| N       | 1.04              | -0.90           | 1.03                 | -0.92           | 0.00                | 0.02                 |
| O       | -2.34             | -4.29           | -2.36                | -4.30           | 0.02                | 0.01                 |
| F       | -2.72             | -4.66           | -2.73                | -4.67           | 0.01                | 0.01                 |
| P       | 2.07              | 0.12            | 2.05                 | 0.11            | 0.02                | 0.01                 |

**Table S4** The adsorption energies ( $E_d$ ) of the most favorable configurations for Li, Na, and K adsorbed on the pristine and heteroatom-doped monolayer  $\text{TiS}_2$  with and without the dipole correction, and their differences ( $\Delta E$ ) with and without the dipole correction.

| Dopants | $E_d$ (Dipole correction) (eV) |       |       | $E_d$ (No dipole correction) (eV) |       |       | $\Delta E$ (eV) |      |      |
|---------|--------------------------------|-------|-------|-----------------------------------|-------|-------|-----------------|------|------|
|         | Li                             | Na    | K     | Li                                | Na    | K     | Li              | Na   | K    |
| None    | -3.56                          | -2.90 | -3.12 | -3.58                             | -2.96 | -3.22 | 0.02            | 0.06 | 0.10 |
| B       | -3.76                          | -3.03 | -3.24 | -3.77                             | -3.06 | -3.32 | 0.01            | 0.03 | 0.08 |
| C       | -4.47                          | -3.80 | -4.03 | -4.48                             | -3.83 | -4.10 | 0.01            | 0.03 | 0.07 |
| N       | -4.14                          | -3.50 | -3.77 | -4.15                             | -3.54 | -3.83 | 0.01            | 0.04 | 0.06 |
| O       | -3.62                          | -3.02 | -3.32 | -3.64                             | -3.05 | -3.38 | 0.02            | 0.03 | 0.06 |
| F       | -3.48                          | -2.89 | -3.20 | -3.49                             | -2.94 | -3.26 | 0.01            | 0.05 | 0.06 |
| P       | -3.80                          | -3.14 | -3.34 | -3.81                             | -3.19 | -3.43 | 0.01            | 0.05 | 0.09 |



**Table S5** Comparison of Li/Na/K diffusion energy barriers of various 2D anode materials.

| 2D materials                     | Diffusion energy barriers (eV) |       |       | Reference |
|----------------------------------|--------------------------------|-------|-------|-----------|
|                                  | Li                             | Na    | K     |           |
| Blue phosphorene                 | 0.16                           | 0.11  | 0.09  | 1,2       |
| Boron-Graphdiyne                 | 0.36                           | 0.28  | 0.12  | 3         |
| Boron phosphide                  | 0.36                           | 0.22  | 0.16  | 4         |
| Borophene                        | 0.011                          | 0.003 | 0.008 | 5         |
| GeS                              | 0.24                           | 0.09  | 0.05  | 6         |
| MoN <sub>2</sub>                 | 0.78                           | 0.56  | 0.49  | 7         |
| MoS <sub>2</sub>                 | 0.25                           | 0.28  |       | 8,9       |
| ReN <sub>2</sub>                 |                                | 0.03  | 0.13  | 10        |
| ReS <sub>2</sub>                 | 0.33                           | 0.16  |       | 11        |
| Si <sub>2</sub> BN               | 0.48                           | 0.32  |       | 12        |
| Si <sub>3</sub> C                | 0.47                           | 0.34  | 0.18  | 13        |
| Silicene                         | 0.24                           | 0.14  |       | 14,15     |
| Ti <sub>3</sub> C <sub>2</sub>   | 0.07                           | 0.10  | 0.10  | 16        |
| Ti <sub>2</sub> CP <sub>2</sub>  | 0.32                           | 0.29  | 0.19  | 17        |
| Ti <sub>2</sub> CSi <sub>2</sub> | 0.29                           | 0.22  | 0.08  | 17        |
| VS <sub>2</sub>                  | 0.22                           | 0.09  | 0.06  | 18,19     |

## References

- 1 Q. F. Li, C. G.; Duan, X. G. Wan and J. L. Kuo, *J. Phys. Chem. C*, 2015, **119**, 8662–8670.
- 2 S. Mukherjee, L. Kavalsky and C. V. Singh, *ACS Appl. Mater. Interfaces*, 2018, **10**, 8630–8639.
- 3 I. Muhammad, S. Wang, J. Liu, H. Xie and Q. Sun, *J. Renew. Sustain. Ener.*, 2019, **11**, 014106.
- 4 H. R. Jiang, W. Shyy, M. Liu, L. Wei, M. C. Wu and T. S. Zhao, *J. Mater. Chem. A*, 2017, **5**, 672–679.
- 5 D. Rao, L. Zhang, Z. Meng, X. Zhang, Y. Wang, G. Qiao, X. Shen, H. Xia, J. Liu and R. Lu, *J. Mater. Chem. A*, 2017, **5**, 2328–2338.
- 6 F. Li, Y. Qu and M. Zhao, *J. Mater. Chem. A*, 2016, **4**, 8905–8912.
- 7 X. Zhang, Z. Yu, S. S. Wang, S. Guan, H. Y. Yang, Y. Yao and S. A. Yang, *J. Mater. Chem. A*, 2016, **4**, 15224–15231.
- 8 Y. Jing, Z. Zhou, C. R. Cabrera and Z. Chen, *J. Phys. Chem. C*, 2013, **117**, 25409–25413.
- 9 M. Mortazavi, C. Wang, J. Deng, V. B. Shenoy and N. V. Medhekar, *J. Power Sources*, 2014, **268**, 279–286.
- 10 S. H. Zhang and B. G. Liu, *Nanotechnology*, 2018, **29**, 325401.
- 11 S. Mukherjee, A. Banwait, S. Grixti, N. Koratkar and C. V. Singh, *ACS Appl. Mater. Interfaces*, 2018, **10**, 5373–5384.
- 12 V. Shukla, R. B. Araujo, N. K. Jena and R. Ahuja, *Nano Energy*, 2017, **41**,

251–260.

13 Y. Wang and Y. Li, *J. Mater. Chem. A*, 2020, **8**, 4274–4282.

14 G. A. Tritsarlis, E. Kaxiras, S. Meng and E. Wang, *Nano Lett.*, 2013, **13**, 2258–2263.

15 S. Xu, X. Fan, J. Liu, Q. Jiang, W. Zheng and D. J. Singh, *Electrochim. Acta*, 2019, **297**, 497–503.

16 D. Er, J. Li, M. Naguib, Y. Gogotsi and V. B. Shenoy, *ACS Appl. Mater. Interfaces*, 2014, **6**, 11173–11179.

17 J. Zhu and U. Schwingenschlögl, *2D Mater.*, 2017, **4**, 025073.

18 D. B. Putungan, S. H. Lin and J. L. Kuo, *ACS Appl. Mater. Interfaces*, 2016, **8**, 18754–18762.

19 D. Wang, Y. Liu, X. Meng, Y. Wei, Y. Zhao, Q. Pang and G. Chen, *J. Mater. Chem. A*, 2017, **5**, 21370–21377.
